# Supplementary material for: Vegetation control on nutrient availability and supply in high-elevation tropical Andean ecosystems
Source: Copernicus journal article supplement (doi:10.5194/egusphere-2023-2750), 2023-12-06
Supplement: Supplementary file 1 [file egusphere-2023-2750-supplement.pdf]

# **Vegetation control on nutrient availability and supply in high-elevation tropical Andean ecosystems**

Armando Molina<sup>1,2</sup>, Veerle Vanacker<sup>3</sup>, Oliver Chadwick<sup>4</sup>, Santiago Zhiminaicela<sup>5</sup>, Marife Corre<sup>1</sup>, and Edzo Veldkamp<sup>1</sup>

5 <sup>1</sup>Soil Science of Tropical and Subtropical Ecosystems, Faculty of Forest Sciences and Forest Ecology, University of Göttingen, Göttingen, Germany.

<sup>2</sup>Facultad de Ciencias Agropecuarias, Universidad de Cuenca, Campus Yanuncay, Cuenca, Ecuador.

<sup>3</sup>Earth and Life Institute, Centre for Earth and Climate Research, University of Louvain, 3 Place Louis Pasteur, B-1348 Louvain-la-Neuve, Belgium.

10 <sup>4</sup>Department of Geography, University of California, Santa Barbara, Santa Barbara, CA 93106-4060, USA.

<sup>5</sup>Subgerencia de Operaciones, Agua Potable y Saneamiento, Empresa Pública Municipal de Telecomunicaciones, Agua Potable, Alcantarillado y Saneamiento de Cuenca (ETAPA EP), Cuenca, Ecuador.

15 *Correspondence to:* A. Molina (Armando.molinv@ucuenca.edu.ec). Facultad de Ciencias Agropecuarias, Universidad de Cuenca, Campus Yanuncay, Cuenca, Ecuador.

## **Supplementary materials including**

20 Table S1  
Table S2  
Table S3  
Table S4

25 Figure S1  
Figure S2  
Figure S3  
Figure S4

**Table S1: Mean annual volumetric water content, and the effective and maximum rooting depth per soil profile.**

|                      | VMC<br>cm <sup>3</sup> cm <sup>-3</sup> | Rooting depth (cm) |                 |
|----------------------|-----------------------------------------|--------------------|-----------------|
|                      |                                         | Effective roots    | Maximum rooting |
| FR1 Upper            | 0.55                                    | no data            | no data         |
| FR1 Middle           | 0.49                                    | no data            | no data         |
| FR1 Lower            | 0.50                                    | no data            | no data         |
| FR2 Upper            | 0.55                                    | 35                 | 80              |
| FR2 Middle           | 0.49                                    | 45                 | 60              |
| FR2 Lower            | 0.49                                    | 55                 | 85              |
| FR3 Upper            | 0.55                                    | 45                 | 65              |
| FR3 Middle           | 0.49                                    | 40                 | 90              |
| FR3 Lower            | 0.50                                    | 45                 | 110             |
| PR1 Upper            | 0.55                                    | 25                 | no data         |
| PR1 Middle           | 0.49                                    | 30                 | 80              |
| PR1 Lower            | 0.53                                    | 35                 | 60              |
| PR2 Upper            | 0.57                                    | 42                 | 100             |
| PR2 Middle           | 0.60                                    | 50                 | 100             |
| PR2 Lower            | 0.53                                    | 50                 | 90              |
| PR3 Upper            | 0.60                                    | 50                 | 70              |
| PR3 Middle           | 0.65                                    | 45                 | 65              |
| PR3 Lower            | 0.58                                    | 35                 | 50              |
| PR4 Upper            | 0.60                                    | 35                 | 55              |
| PR4 Middle           | 0.62                                    | 50                 | 100             |
| PR4 Lower            | 0.55                                    | 45                 | 85              |
| PR5 Upper            | 0.56                                    | 40                 | 65              |
| PR5 Middle           | 0.50                                    | 40                 | 70              |
| PR5 Lower            | 0.55                                    | 40                 | 60              |
| CU2 Upper            | 0.51                                    | 35                 | 60              |
| CU2 Middle           | 0.71                                    | 30                 | 45              |
| CU2 Lower            | 0.57                                    | 30                 | 70              |
| CU3 Upper            | 0.51                                    | 40                 | 40              |
| CU3 Middle           | 0.73                                    | 40                 | 50              |
| CU3 Lower            | 0.59                                    | 35                 | 45              |
| CU4 Upper            | 0.54                                    | 30                 | 50              |
| CU4 Middle           | 0.73                                    | 30                 | 50              |
| CU4 Lower            | 0.61                                    | 31                 | 50              |
| <b>Mean ± 1 SD</b>   |                                         |                    |                 |
| Forest (FR)          | 0.51±0.03                               | 44±6               | 82±16           |
| Tussock grasses (PR) | 0.57±0.04                               | 41±8               | 75±17           |
| Cushion plants (CU)  | 0.61±0.08                               | 33±4               | 51±8            |

30 **Table S2 : Saturated hydraulic conductivity (mm h<sup>-1</sup>) of the 12 selected soil profiles. The hydraulic conductivity was measured using the inverse auger hole method, and the reported values are the mean values of three replicates.**

|            | Horizon | Hydraulic conductivity<br>mm h <sup>-1</sup> |
|------------|---------|----------------------------------------------|
| FR3 Upper  | A       | 6.0                                          |
|            | C       | 0.3                                          |
| FR3 Middle | A       | 9.3                                          |
|            | C       | 5.6                                          |
| FR3 Lower  | A       | 7.7                                          |
|            | C       | 6.8                                          |
| PR3 Upper  | A       | 6.1                                          |
|            | C       | NA                                           |
| PR3 Middle | A       | 2.6                                          |
|            | C       | 4.9                                          |
| PR3 Lower  | A       | 2.9                                          |
|            | C       | 0.4                                          |
| PR5 Upper  | A       | 2.3                                          |
|            | C       | 1.8                                          |
| PR5 Middle | A       | 2.5                                          |
|            | C       | 1.0                                          |
| PR5 Lower  | A       | 4.6                                          |
|            | C       | 3.3                                          |
| CU4 Upper  | A       | 5.0                                          |
|            | C       | 0.5                                          |
| CU4 Middle | A       | 1.4                                          |
|            | C       | 0.0                                          |
| CU4 Lower  | A       | 11.9                                         |
|            | C       | 0.0                                          |

35 Table S3 : Soil hydrological parameters of 12 selected soil profiles derived from the chloride concentrations in rain and soil water using the approach of White et al. (2009) and Buss et al. (2017).

|               | Precip.<br>Cl<br>$\mu\text{M}$ | Soil water<br>Cl<br>$\mu\text{M}$ | Precip. flux<br>$q_{\text{preci}}$<br>$\text{m yr}^{-1}$ | Soil water<br>flux, $q_h$<br>$\text{m yr}^{-1}$ | Porosity<br>$\emptyset$<br>$\text{m}^3 \text{m}^{-3}$ | Saturation<br>$f$<br>$\text{m}^3 \text{m}^{-3}$ | Infiltration<br>Rate<br>$\text{m yr}^{-1}$ | Residence<br>time<br>yr |
|---------------|--------------------------------|-----------------------------------|----------------------------------------------------------|-------------------------------------------------|-------------------------------------------------------|-------------------------------------------------|--------------------------------------------|-------------------------|
| Rainfall      | 13                             |                                   | 0.55                                                     |                                                 |                                                       |                                                 |                                            |                         |
| FR3 Upper     |                                | 17                                |                                                          | 0.43                                            | 0.70                                                  | 0.65                                            |                                            |                         |
| FR3 Middle    |                                | 19                                |                                                          | 0.38                                            | 0.73                                                  | 0.56                                            |                                            |                         |
| FR3 Lower     |                                | 19                                |                                                          | 0.39                                            | 0.66                                                  | 0.70                                            |                                            |                         |
| PR3 Upper     |                                | 15                                |                                                          | 0.51                                            | 0.75                                                  | 0.77                                            |                                            |                         |
| PR3 Middle    |                                | 12                                |                                                          | 0.59                                            | 0.79                                                  | 0.76                                            |                                            |                         |
| PR3 Lower     |                                | 13                                |                                                          | 0.58                                            | 0.71                                                  | 0.72                                            |                                            |                         |
| PR5 Upper     |                                | 49                                |                                                          | 0.15                                            | 0.65                                                  | 0.63                                            |                                            |                         |
| PR5 Middle    |                                | 18                                |                                                          | 0.40                                            | 0.72                                                  | 0.69                                            |                                            |                         |
| PR5 Lower     |                                | 14                                |                                                          | 0.54                                            | 0.71                                                  | 0.69                                            |                                            |                         |
| CU4 Upper     |                                | 17                                |                                                          | 0.43                                            | 0.57                                                  | 0.71                                            |                                            |                         |
| CU4 Middle    |                                | 24                                |                                                          | 0.31                                            | 0.64                                                  | 0.76                                            |                                            |                         |
| CU4 Lower     |                                | 25                                |                                                          | 0.30                                            | 0.65                                                  | 0.65                                            |                                            |                         |
| Mean $\pm$ SD |                                |                                   |                                                          |                                                 |                                                       |                                                 |                                            |                         |
| FR            |                                |                                   |                                                          | 0.40 $\pm$ 0.03                                 | 0.70 $\pm$ 0.03                                       | 0.64 $\pm$ 0.07                                 | <b>0.90</b>                                | <b>0.55</b>             |
| PR            |                                |                                   |                                                          | 0.46 $\pm$ 0.17                                 | 0.72 $\pm$ 0.05                                       | 0.71 $\pm$ 0.05                                 | <b>0.91</b>                                | <b>0.55</b>             |
| CU            |                                |                                   |                                                          | 0.35 $\pm$ 0.08                                 | 0.62 $\pm$ 0.04                                       | 0.71 $\pm$ 0.05                                 | <b>0.79</b>                                | <b>0.63</b>             |

40 Table S4: Mean annual ion concentrations ( $\mu\text{M L}^{-1}$ ) and pH of the soil solutes per soil profile.

|            | Ca            | K     | Mg    | Na     | Si      | P       | Cl    | S     | Al    | Fe      | pH      |
|------------|---------------|-------|-------|--------|---------|---------|-------|-------|-------|---------|---------|
|            | $\mu\text{M}$ |       |       |        |         |         |       |       |       |         |         |
| FR1 Upper  | 15±9          | 27±36 | 7±8   | 32±19  | 6±3     | 0.1±0.1 | 17±19 | 7±3   | 16±7  | 1±0     | 5.6±0.4 |
| FR1 Lower  | 19±5          | 95±10 | 8±3   | 33±19  | 9±10    | 0.2±0.1 | 21±8  | 17±2  | 12±6  | 1±0     | 5.8±0.3 |
| FR2 Upper  | 40±44         | 22±33 | 17±23 | 173±55 | 14±10   | 0.4±0.2 | 28±25 | 14±5  | 21±22 | 1±1     | 5.6±0.5 |
| FR2 Middle | 21±6          | 19±17 | 12±3  | 89±17  | 68±53   | 0.2±0.1 | 15±6  | 10±12 | 2±2   | 1±2     | 6.7±0.2 |
| FR2 Lower  | 17±8          | 22±15 | 12±7  | 50±12  | 10±7    | 0.2±0.1 | 18±11 | 9±1   | 11±9  | 1±0     | 5.6±0.3 |
| FR3 Middle | 63±14         | 57±14 | 28±8  | 45±19  | 10±7    | 0.2±0.2 | 19±11 | 6±1   | 23±11 | 1±0     | 4.9±0.5 |
| FR3 Lower  | 19±4          | 27±3  | 10±2  | 62±15  | 12±9    | 0.1±0.1 | 19±7  | 15±1  | 3±3   | 1±0     | 6.3±0.2 |
| PR1 Upper  | 22±5          | 23±4  | 11±4  | 82±26  | 44±42   | 0.4±0.5 | 13±9  | 4±2   | 3±3   | 3±8     | 6.6±0.2 |
| PR1 Middle | 26±11         | 8±4   | 9±4   | 69±27  | 43±31   | 0.4±0.2 | 16±8  | 5±4   | 1±1   | 0.2±0.1 | 6.6±0.3 |
| PR1 Lower  | 23±5          | 5±1   | 12±3  | 56±11  | 56±29   | 0.3±0.3 | 12±6  | 2±2   | 0±1   | 0.2±0.2 | 6.6±0.3 |
| PR2 Upper  | 10±4          | 4±2   | 6±3   | 51±17  | 22±42   | 0.2±0.2 | 9±2   | 2±1   | 1±1   | 0.2±0.2 | 6.4±0.2 |
| PR2 Middle | 10±3          | 5±3   | 5±3   | 28±15  | 21±44   | 0.2±0.1 | 8±7   | 2±2   | 1±1   | 0.3±0.2 | 6.3±0.2 |
| PR2 Lower  | 16±5          | 6±1   | 9±3   | 35±19  | 19±20   | 0.1±0.1 | 10±5  | 2±1   | 2±2   | 0.4±0.3 | 6.5±0.2 |
| PR3 Upper  | 14±2          | 18±3  | 6±2   | 52±15  | 14±10   | 0.1±0.1 | 15±7  | 3±1   | 3±3   | 6±7     | 6.4±0.2 |
| PR3 Middle | 17±3          | 15±6  | 9±3   | 27±14  | 8±7     | 0.2±0.2 | 12±6  | 4±3   | 4±3   | 2±2     | 6.3±0.3 |
| PR3 Lower  | 23±6          | 8±3   | 12±3  | 45±14  | 17±19   | 0.1±0.1 | 13±5  | 6±2   | 3±3   | 1±0     | 6.6±0.2 |
| PR4 Upper  | 15±5          | 20±26 | 7±5   | 56±27  | 15±14   | 0.3±0.4 | 16±8  | 5±4   | 3±3   | 3±5     | 6.4±0.2 |
| PR4 Middle | 12±5          | 4±3   | 5±4   | 39±24  | 19±45   | 0.1±0.1 | 9±6   | 2±1   | 2±2   | 2±3     | 6.4±0.2 |
| PR4 Lower  | 14±4          | 8±2   | 5±1   | 33±16  | 9±14    | 0.2±0.1 | 10±6  | 4±2   | 5±3   | 1±1     | 6.2±0.3 |
| PR5 Upper  | 33±10         | 28±7  | 13±4  | 76±29  | 43±29   | 0.2±0.1 | 49±18 | 6±2   | 1±1   | 0.3±0.2 | 6.6±0.2 |
| PR5 Middle | 26±7          | 5±2   | 10±4  | 90±21  | 100±62  | 0.2±0.2 | 18±9  | 4±2   | 1±1   | 0.2±0.1 | 6.7±0.2 |
| PR5 Lower  | 29±13         | 14±5  | 8±3   | 136±47 | 147±81  | 0.2±0.2 | 14±6  | 5±3   | 1±1   | 1±1     | 6.9±0.2 |
| CU2 Upper  | 60±12         | 17±3  | 30±6  | 104±24 | 261±62  | 0.2±0.2 | 14±9  | 3±2   | 1±0   | 4±4     | 7.1±0.3 |
| CU2 Middle | 56±9          | 4±2   | 43±7  | 97±14  | 97±74   | 0.1±0.1 | 16±7  | 3±1   | 1±1   | 10±13   | 7.0±0.2 |
| CU2 Lower  | 38±6          | 4±2   | 27±4  | 105±23 | 99±76   | 0.1±0.1 | 12±8  | 3±2   | 1±1   | 3±6     | 6.9±0.1 |
| CU3 Upper  | 92±17         | 17±2  | 16±6  | 177±29 | 277±161 | 0.2±0.2 | 25±12 | 5±1   | 2±3   | 1±1     | 7.0±0.2 |
| CU3 Middle | 85±12         | 11±1  | 19±2  | 162±19 | 232±111 | 0.2±0.1 | 16±5  | 4±1   | 1±1   | 1±1     | 7.1±0.2 |
| CU3 Lower  | 93±45         | 22±27 | 25±14 | 211±64 | 362±122 | 0.3±0.1 | 28±30 | 10±16 | 2±3   | 1±1     | 7.3±0.3 |
| U4 Upper   | 89±17         | 23±2  | 10±3  | 186±35 | 427±182 | 0.1±0.1 | 17±11 | 4±1   | 1±1   | 0.2±0.1 | 7.2±0.1 |
| CU4 Middle | 162±62        | 38±5  | 35±13 | 355±22 | 472±168 | 0.3±0.2 | 24±10 | 3±1   | 1±1   | 3±4     | 7.5±0.4 |
| CU4 Lower  | 66±21         | 17±4  | 15±4  | 230±59 | 390±193 | 0.2±0.1 | 25±24 | 4±3   | 2±2   | 1±1     | 7.1±0.2 |

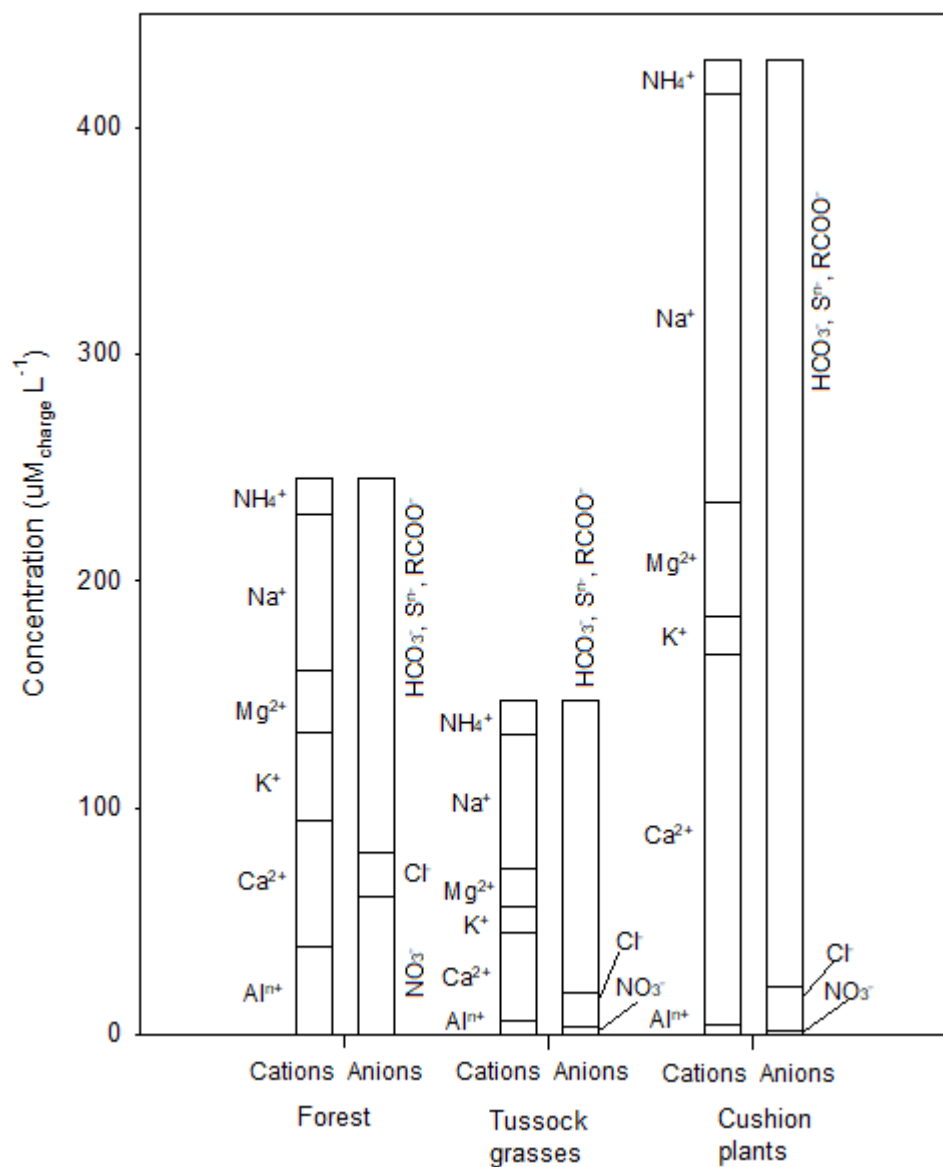

45

Figure S1: Partial cation–anion charge balance of the major solutes (with concentrations  $> 0.03 \text{ mg L}^{-1}$ ) in soil water at a depth of 0.5 m. The y axis scale shows the three different vegetation types.

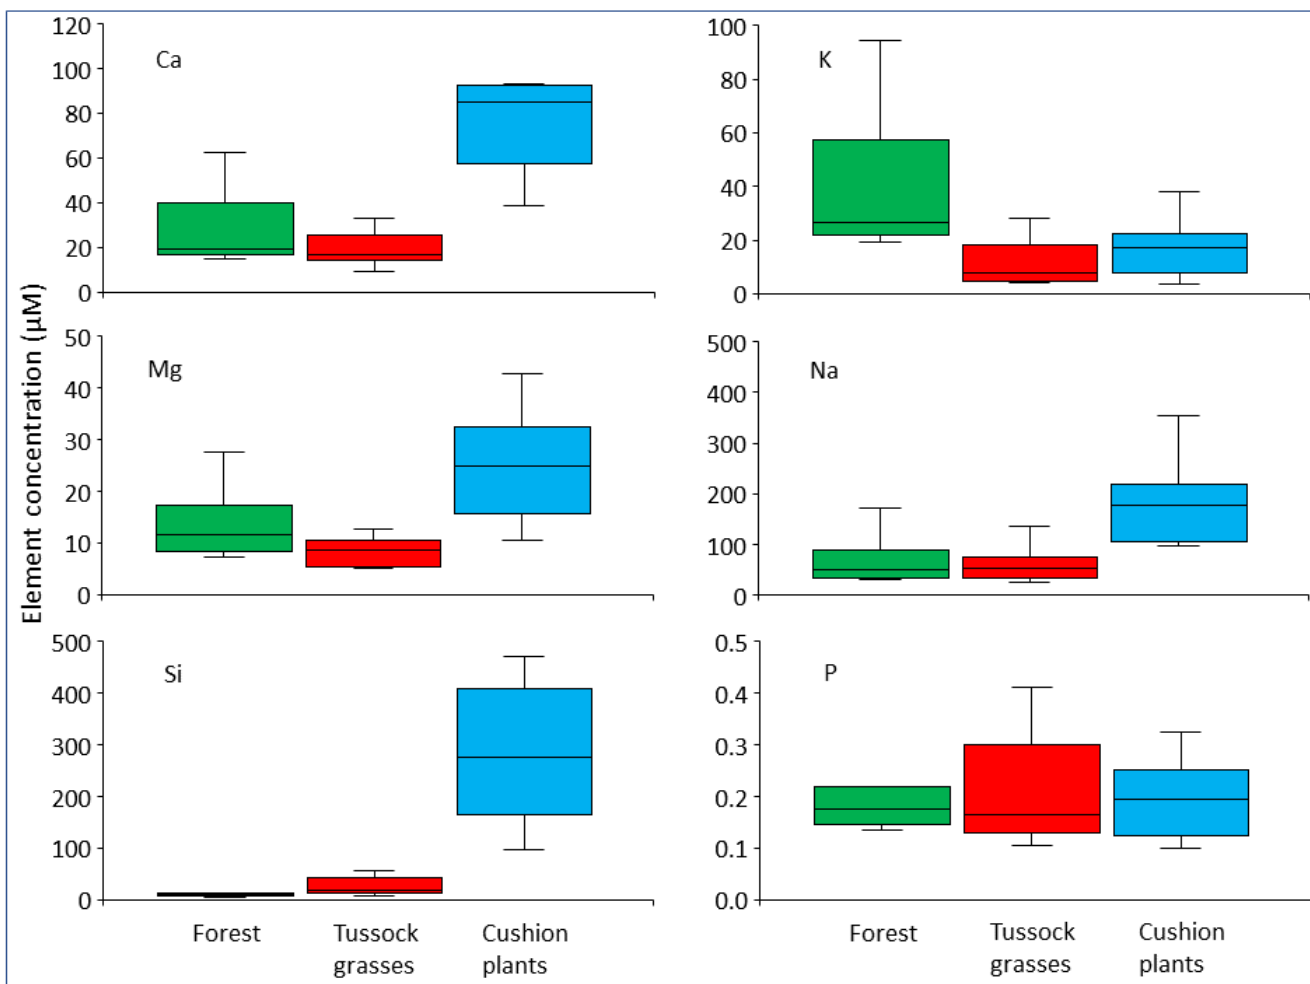

50

Figure S2: Major element concentrations in soil pore water ( $\mu\text{M L}^{-1}$ ) under forests (n=7), tussock grasses (n=15) and cushion plants (n=9).

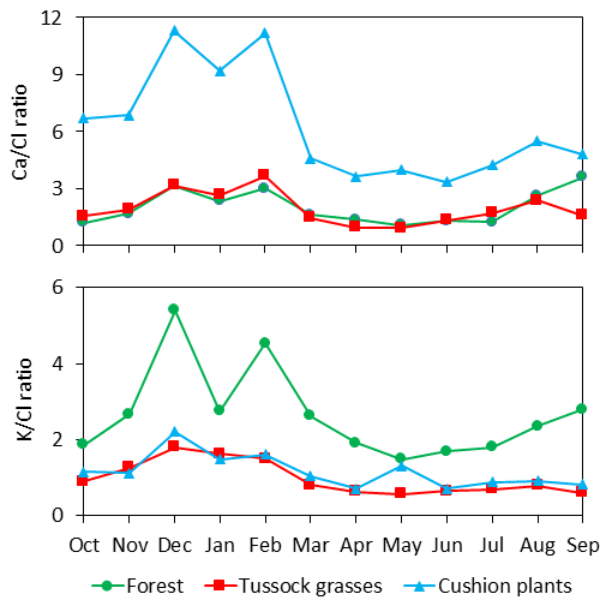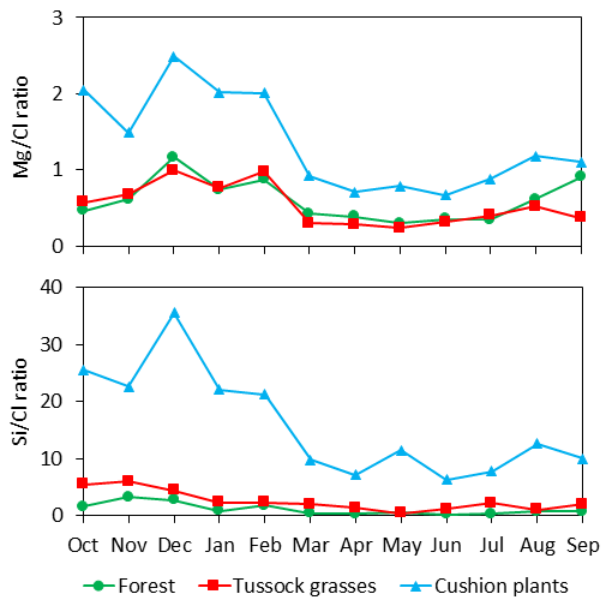

55

**Figure S3: Temporal variation in the ratio of Ca, Mg and K nutrients to Chloride in the soil solutes under forest (n=7), tussock grasses (n=15) and cushion plants (n=9). The mean monthly values are plotted in the graphs.**



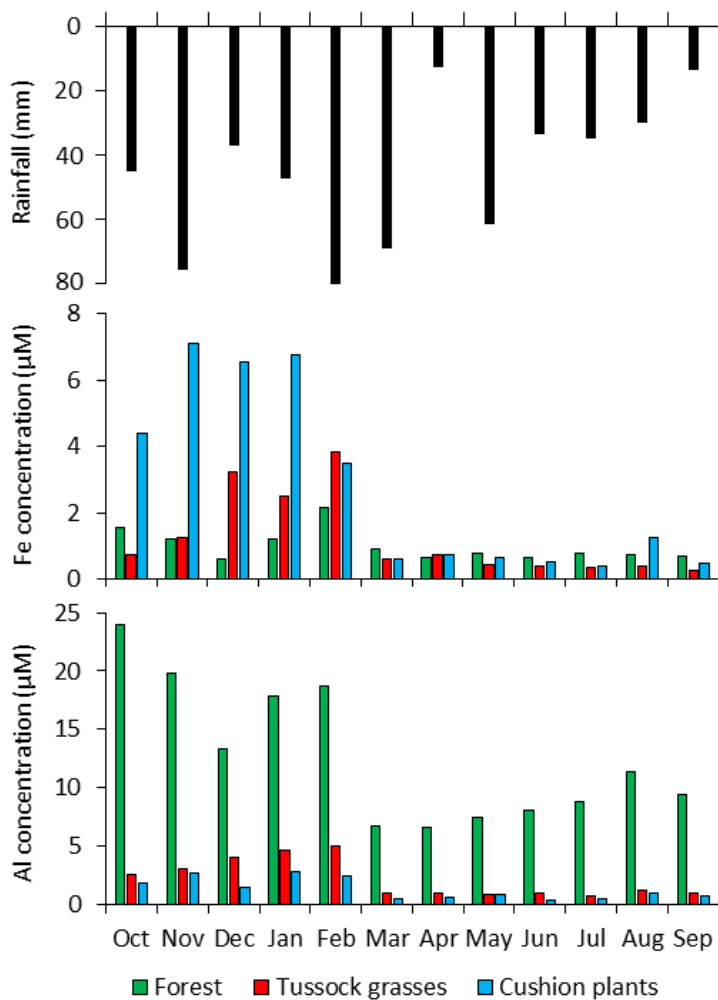

60

**Figure S4: Mean monthly rainfall (mm) and mean monthly Al and Fe concentrations ( $\mu\text{M L}^{-1}$ ) in soil solutes under forests, tussock grasses and cushion-forming plants.**

## 65 References

- Buss, H. L., Chapela Lara, M., Moore, O. W., Kurtz, A. C., Schulz, M. S., and White, A. F.: Lithological influences on contemporary and long-term regolith weathering at the Luquillo Critical Zone Observatory, *Geochim. Cosmochim. Ac.*, 196, 224–251, <https://doi.org/10.1016/j.gca.2016.09.038>, 2017.
- 70 White, A. F., Schulz, M. S., Stonestrom, D. A., Vivit, D. V., Fitzpatrick, J., Bullen, T. D., Maher, K., and Blum, A. E.: Chemical weathering of a marine terrace chronosequence, Santa Cruz, California. Part II: Solute profiles, gradients and the comparisons of contemporary and long-term weathering rates, *Geochim. Cosmochim. Acta*, 73, 2769–2803, <https://doi.org/10.1016/j.gca.2009.01.029>, 2009.
